# Supplementary material for: The Effect of the Selective N-methyl-D-aspartate (NMDA) Receptor GluN2B Subunit Antagonist CP-101,606 on Cytochrome P450 2D (CYP2D) Expression and Activity in the Rat Liver and Brain
Source: MDPI journal article supplement (doi:10.3390/ijms232213746), 2022-11-08
Supplement: s1 [file s1]

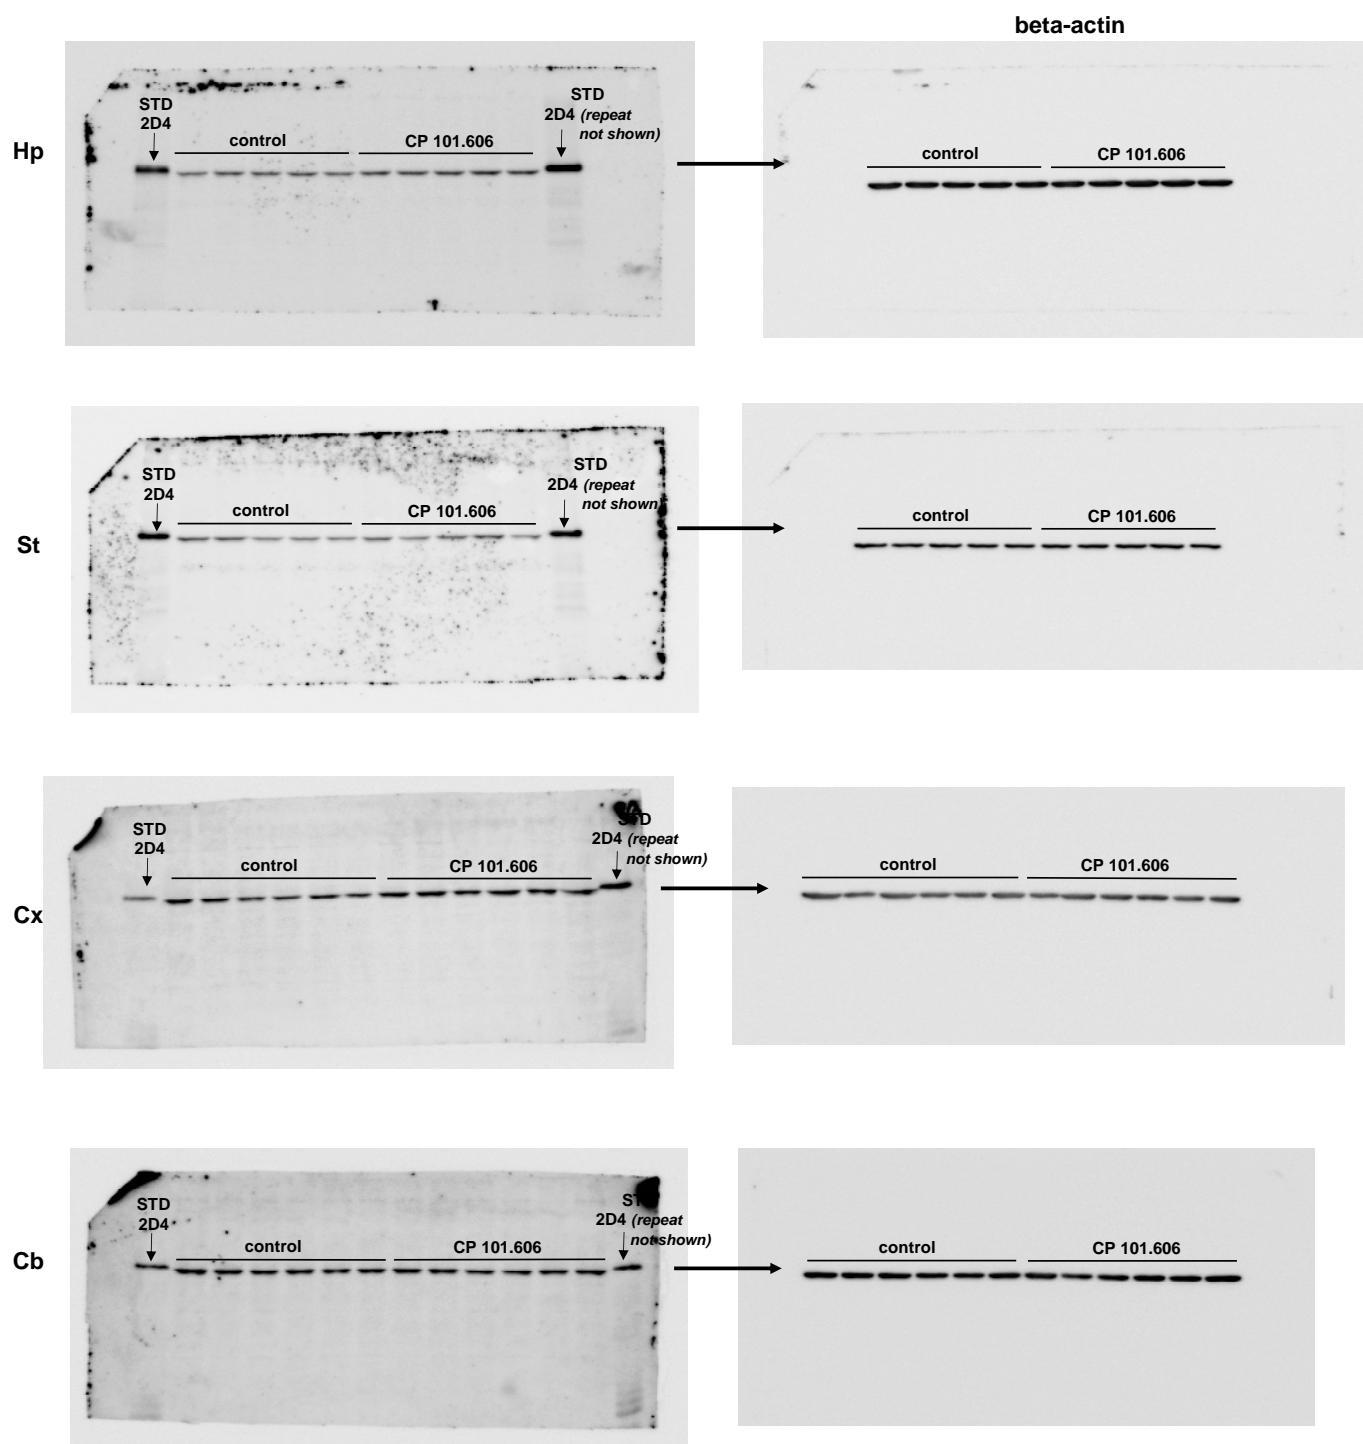

**Figure S1.** The influence of 5-day treatment with CP-101,606 on the CYP2D protein level in microsomes from the selected brain regions (original membranes to Figure 1B.).

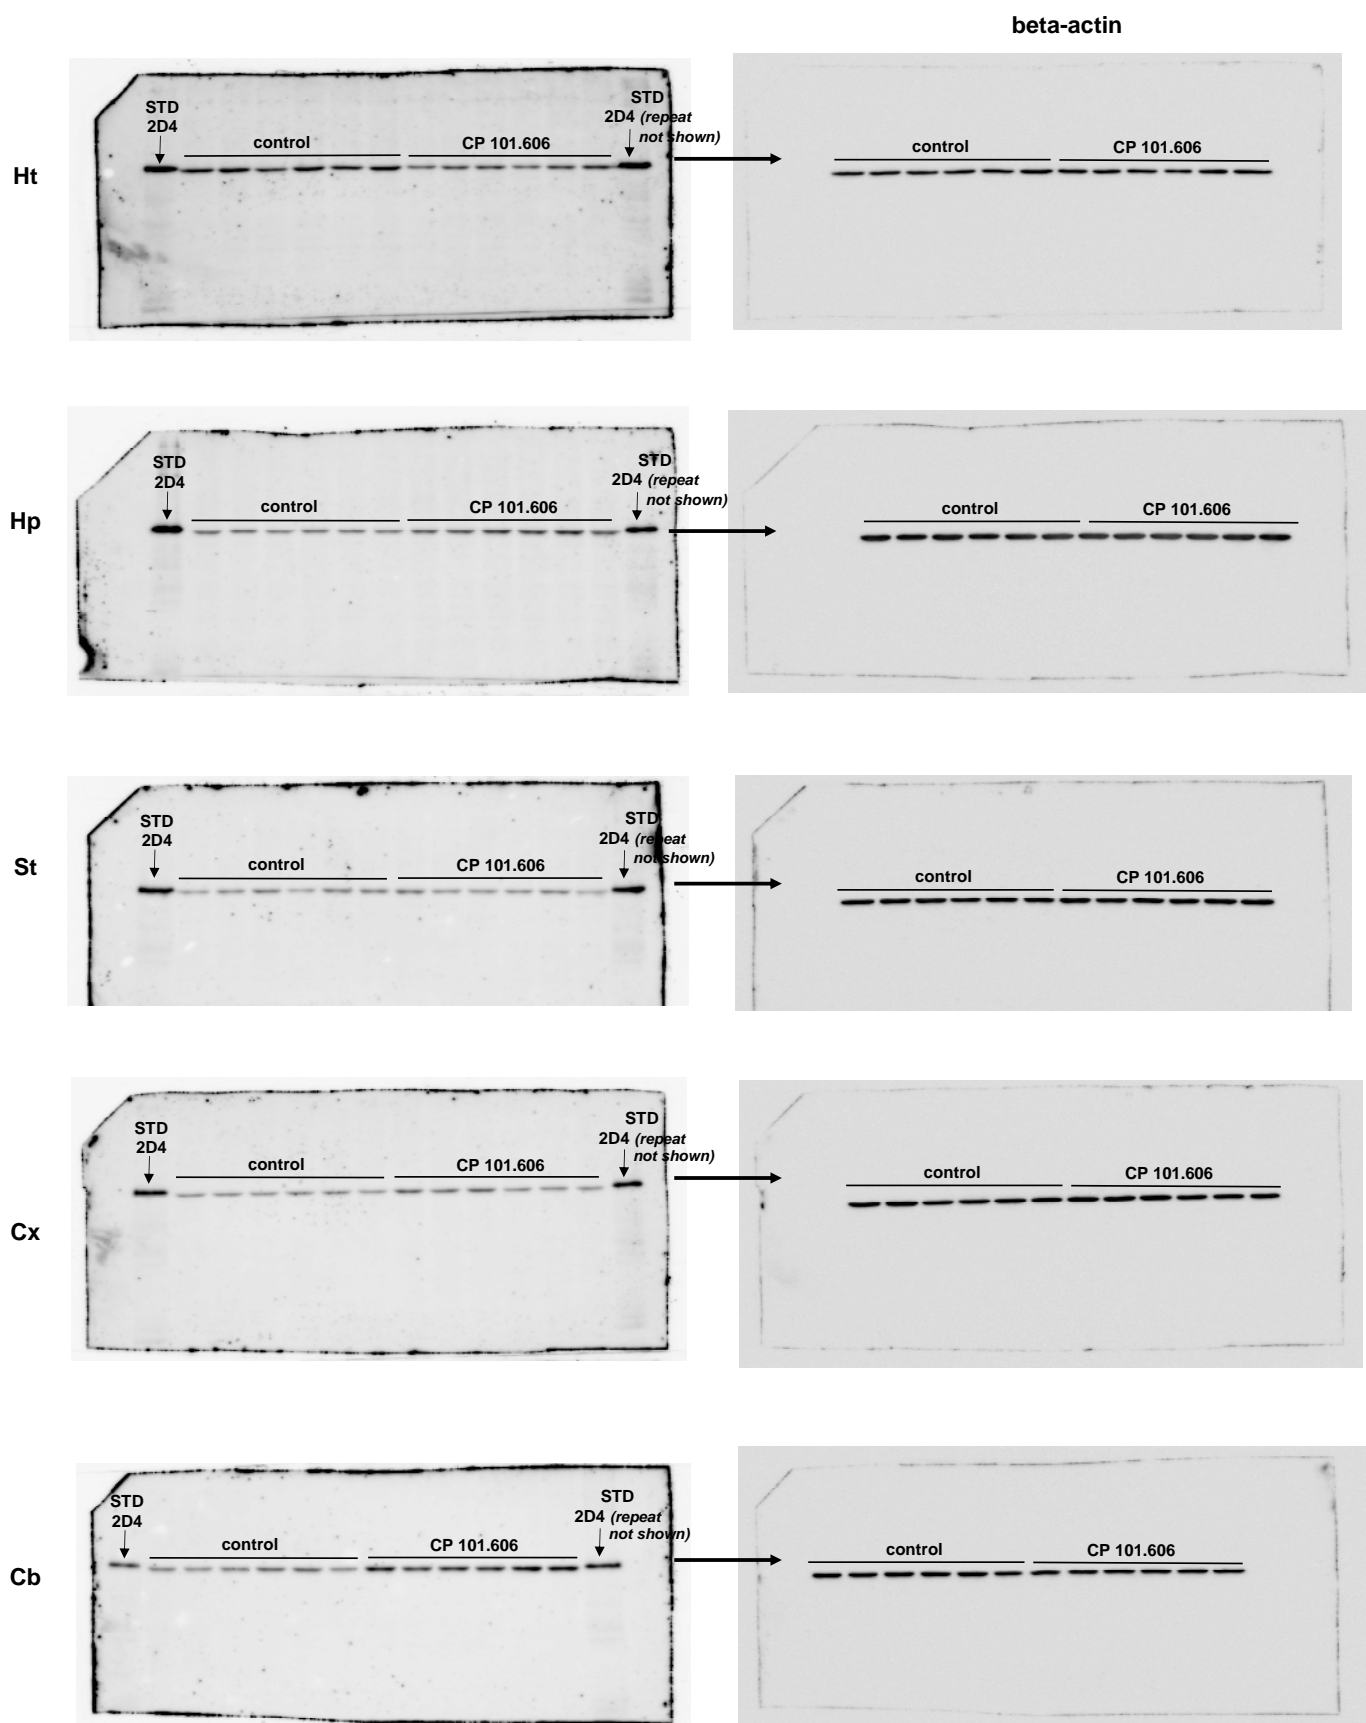

**Figure S2.** The influence of 3-week treatment with CP-101,606 on the CYP2D protein level in microsomes from the selected brain regions (original membranes to Figure 2B.).

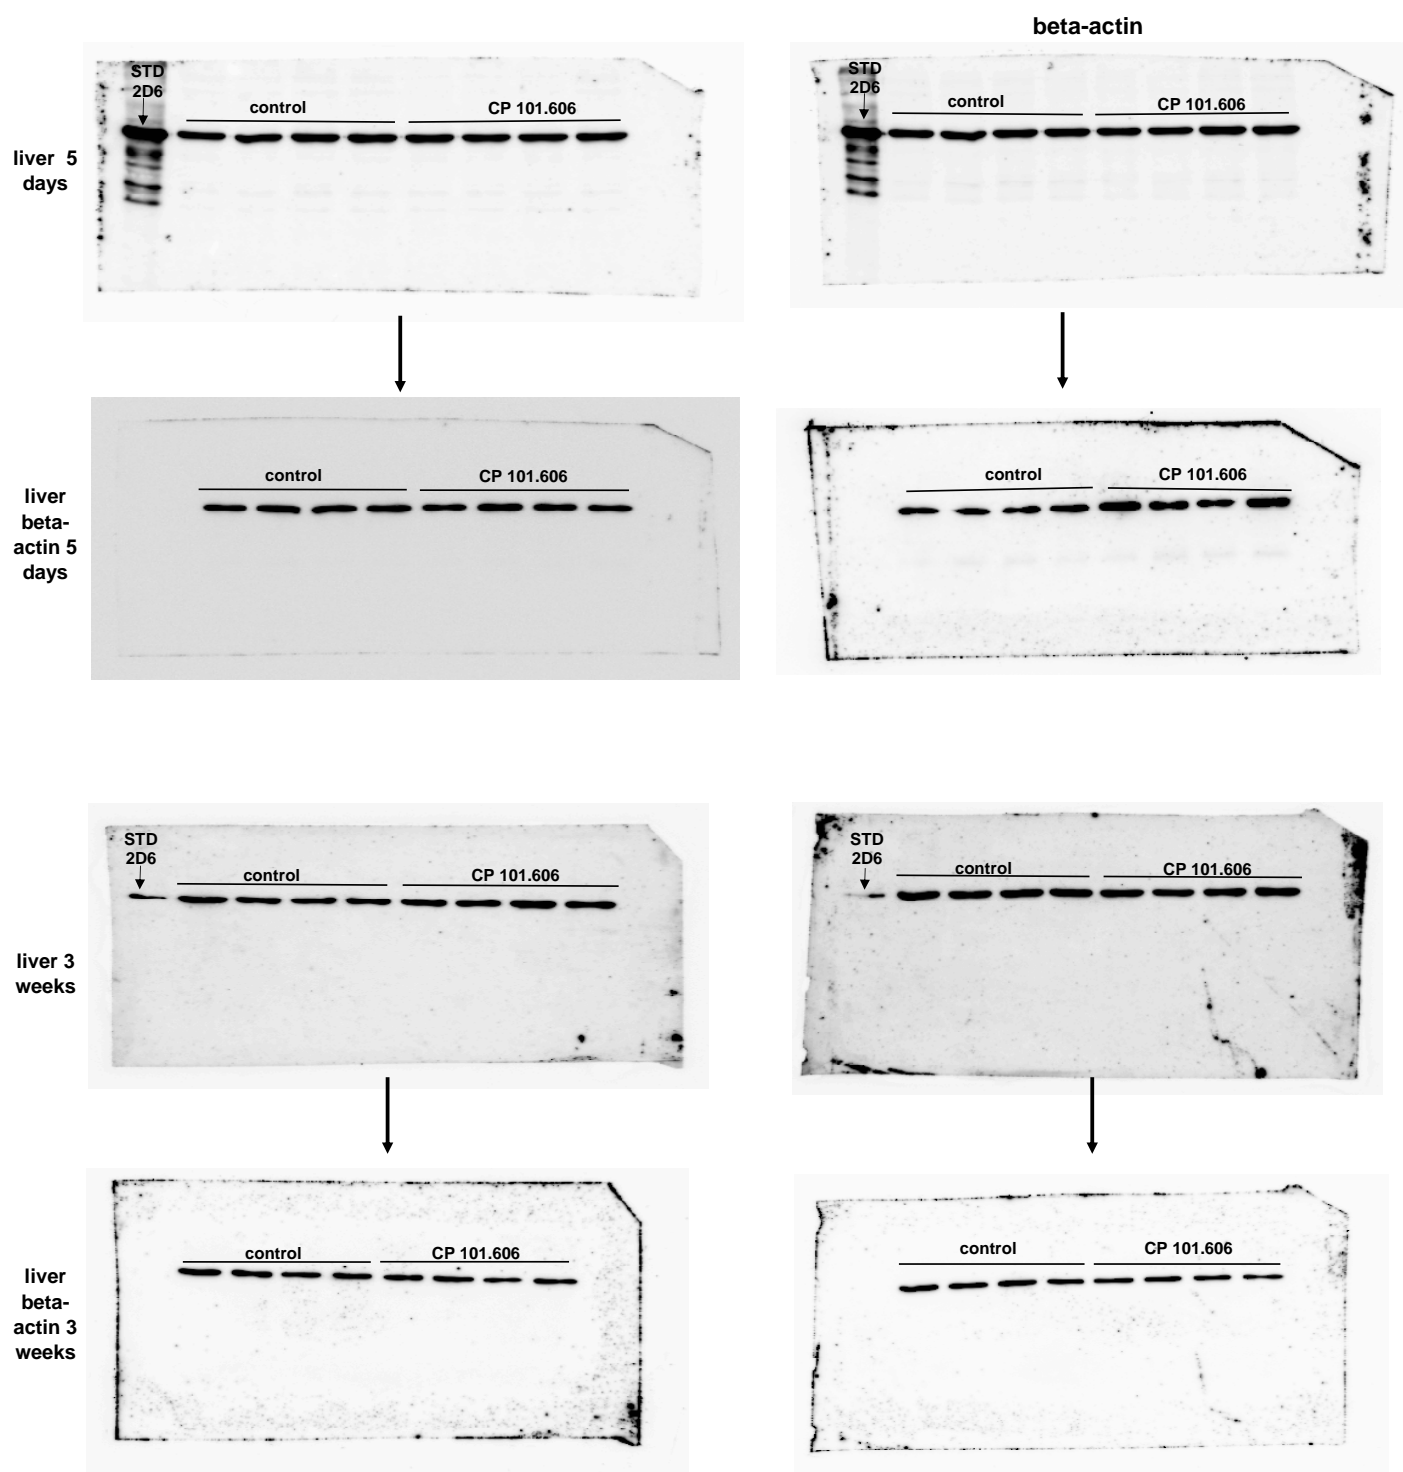

**Figure S3.** The influence of 5-day and 3-week treatment with CP-101,606 on the CYP2D protein level in the liver microsomes (original membranes to Figure 3B.).
